# Supplementary material for: Evaluation of the Antioxidant Activity of the Marine Pyrroloiminoquinone Makaluvamines
Source: PubMed Central journal article supplement (PMC5128740; doi:10.3390/md14110197), 2016-10-27
Supplement: marinedrugs-14-00197-s001.pdf [file marinedrugs-14-00197-s001.pdf]

# Supplementary Materials: Evaluation of the Antioxidant Activity of the Marine Pyrroloiminoquinone Makaluvamines

Eva Alonso, Rebeca Alvariño, Marta Leirós, Jioji N. Tabudravu, Klaus Feussner, Miriam A. Dam, Mostafa E. Rateb, Marcel Jaspars and Luis M. Botana

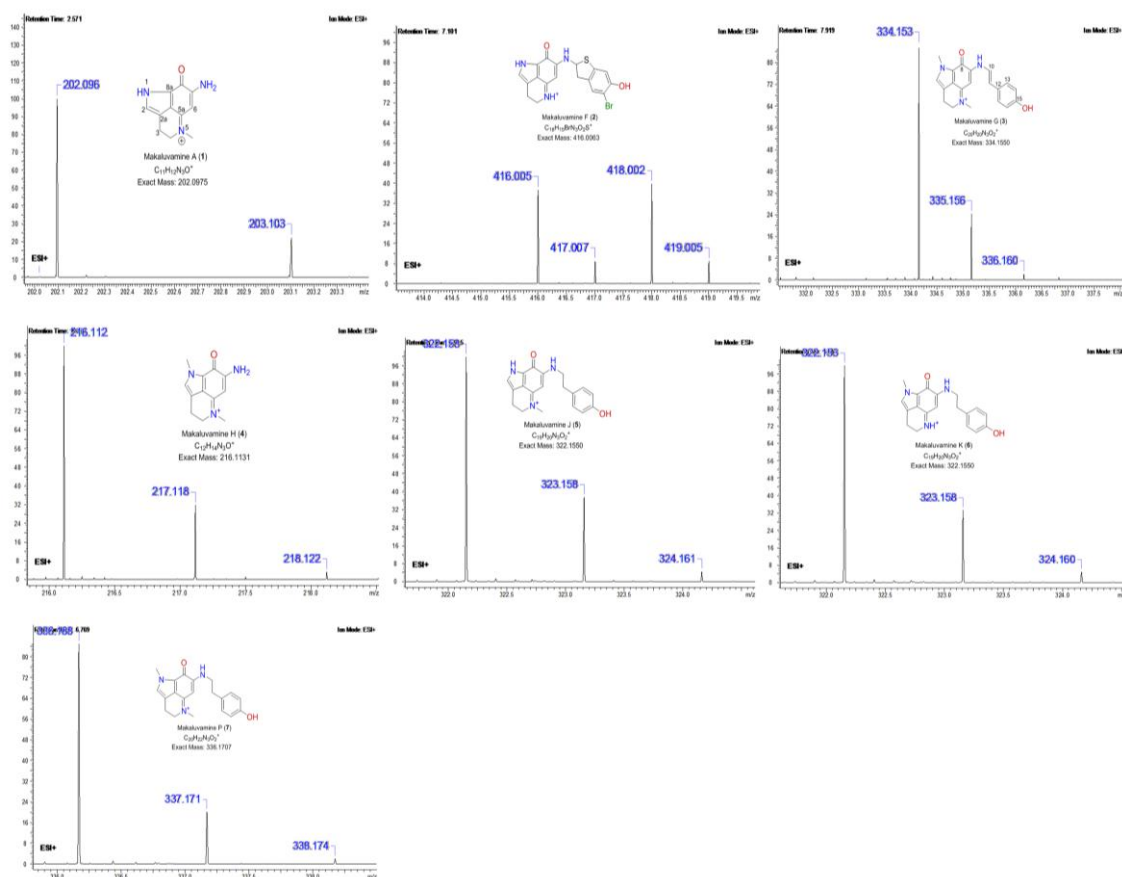

Figure S1. MS analysis of the isolated makaluvamines.

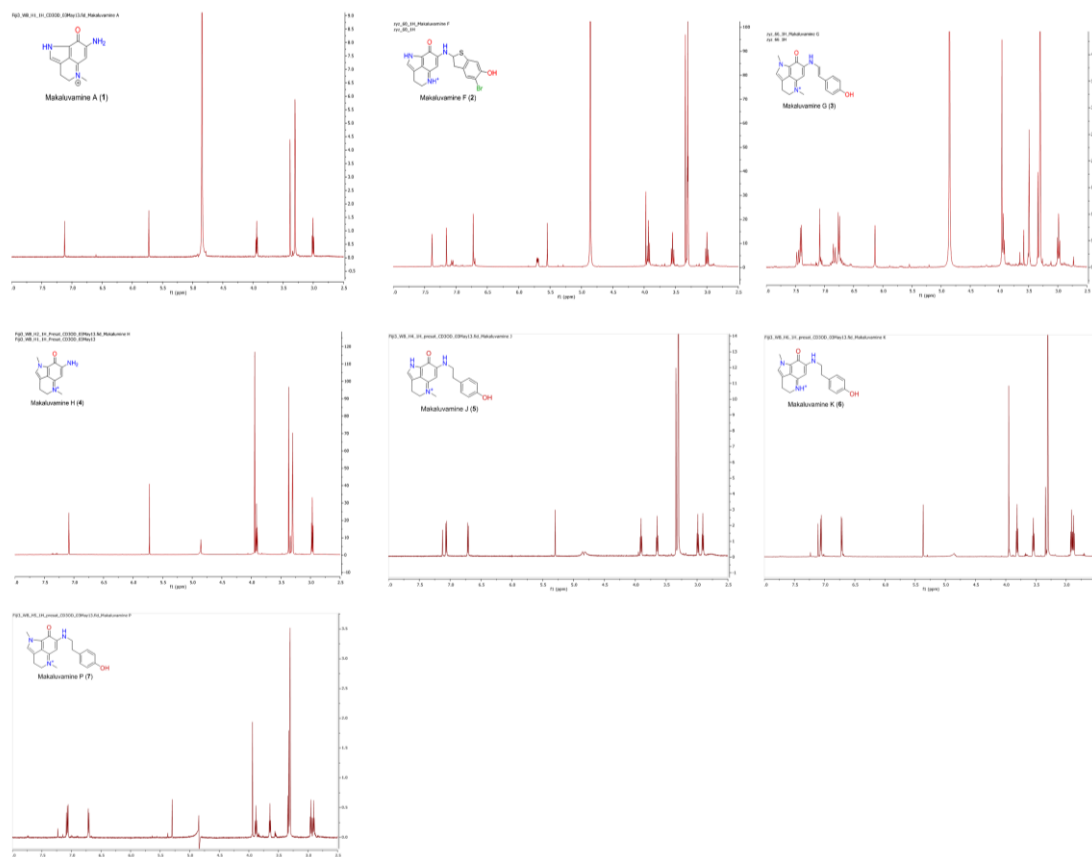

Figure S2. <sup>1</sup>H NMR spectra of the isolated makaluvamines.
